# Supplementary material
Source: Springer Nature journal article supplement (https://www.springermedizin.de/resource/supplementary/12880_2012_193_MOESM3_ESM.pdf/9450200)

**a**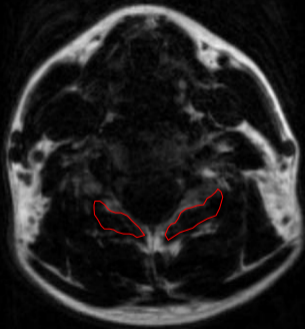**b**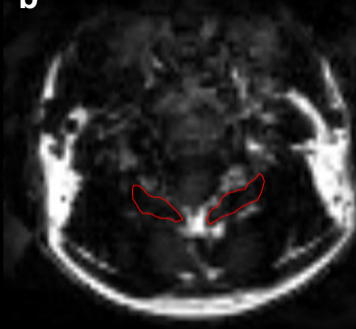

Supplement: MOESM3 [file 9450200]
